# Supplementary material for: Recognition of the key chemical constituents of sewage sludge for biogas production
Source: Royal Society of Chemistry journal article supplement (doi:10.1039/c6ra26180a), 2017-01-01
Supplement: c6ra26180a1.pdf [file c6ra26180a1.pdf]

## Supplementary Information

# Recognition on the Key Chemical Constituents of Sewage Sludge for Biogas Production

Xiaohu Dai<sup>a#</sup>, Ying Xu<sup>a##</sup>, Yiqing Lu<sup>a</sup>, Bin Dong<sup>a\*</sup>

<sup>a</sup> State Key Laboratory of Pollution Control and Resource Reuse, School of Environmental Science and  
Engineering, Tongji University, Shanghai, 200092, China

**\* Corresponding authors:**

Ying Xu and Bin Dong

1239 Siping Road, Shanghai 200092, PR China

Tel.: +86 21 65981794; fax: +86 21 65983602.

E-mail address: [assassinxu@sina.cn](mailto:assassinxu@sina.cn) or [tj\\_dongbin@163.com](mailto:tj_dongbin@163.com)

**Table S1.** Basic constituents of the synthetic wastewater in this study

| Compounds                                                 | Concentration (mg/L) |
|-----------------------------------------------------------|----------------------|
| Sodium acetate (NaCOOH)                                   | 150-200              |
| Glucose (C <sub>6</sub> H <sub>12</sub> O <sub>6</sub> )  | 350-400              |
| Sucrose                                                   | 350-400              |
| Starch                                                    | 350-400              |
| Bovine Serum Albumin (BSA)                                | 150-200              |
| Ammonia chloride (NH <sub>4</sub> Cl)                     | 400-450              |
| Potassium phosphate (KH <sub>2</sub> PO <sub>4</sub> )    | 140-150              |
| Calcium chloride (CaCl <sub>2</sub> ·2H <sub>2</sub> O)   | 0.47                 |
| Magnesium sulfate (MgSO <sub>4</sub> ·7H <sub>2</sub> O)  | 5                    |
| Manganese chloride (MnCl <sub>2</sub> ·4H <sub>2</sub> O) | 0.28                 |
| Zinc sulfate (ZnSO <sub>4</sub> ·7H <sub>2</sub> O)       | 0.45                 |
| Ferric chloride anhydrous (FeCl <sub>3</sub> )            | 1.45                 |
| Cupric sulfate (CuSO <sub>4</sub> ·5H <sub>2</sub> O)     | 0.4                  |
| Cobalt chloride (CoCl <sub>2</sub> ·6H <sub>2</sub> O)    | 0.4                  |

**Table S2.** The basic parameters of different sludge samples in the BMP tests

| Sludge Samples | VS (%TS)   | TS (%)    | Additions (g/200g MS) |                   |        |
|----------------|------------|-----------|-----------------------|-------------------|--------|
|                |            |           | HM                    | FeCl <sub>3</sub> | Silica |
| Seed Sludge    | 47.0 ± 0.3 | 2.3 ± 0.2 | /                     | /                 | /      |
| SS             | 72.3 ± 1.5 | 4.1 ± 0.2 | /                     | /                 | /      |
| MS             | 90.2 ± 2.1 | 1.2 ± 0.3 | /                     | /                 | /      |
| MS-M           | 81.5 ± 0.3 | 1.3 ± 0.1 | /                     | 0.250             | /      |
| MS-Silica      | 77.1 ± 0.1 | 1.4 ± 0.1 | /                     | /                 | 0.630  |
| MS-HM          | 90.5 ± 0.2 | 1.4 ± 0.1 | 0.375                 | /                 | /      |
| MS-HM-M        | 84.5 ± 0.1 | 1.5 ± 0.1 | 0.375                 | 0.250             | /      |
| MS-HM-Silica   | 74.6 ± 0.2 | 1.7 ± 0.2 | 0.375                 | /                 | 0.630  |
| MS-HM-M-Silica | 70.4 ± 0.2 | 1.8 ± 0.2 | 0.375                 | 0.250             | 0.630  |

TS: total solids; VS: volatile solids;

**Text S1.** The context of the Micron-sized silica particles

In this paper, the median particle size of Micron-sized silica particle is about 30  $\mu\text{m}$ , according to the analysis of the silts in sewage sludge in China. [1, 2]

[1] Yuxin Zhao. Investigation on the properties of sewage sludge of WWTPs in China and Experiments on sand removal of sludge. Master's Thesis, 2014. (in Chinese)

[2] Xiaohu Dai, Yuxin Zhao, Sha Chao etc. Investigation on the status and causes of sludge sand content of wastewater treatment plants in China. *Water & Wastewater Engineering*, 2014, 40, 75-79. (in Chinese)

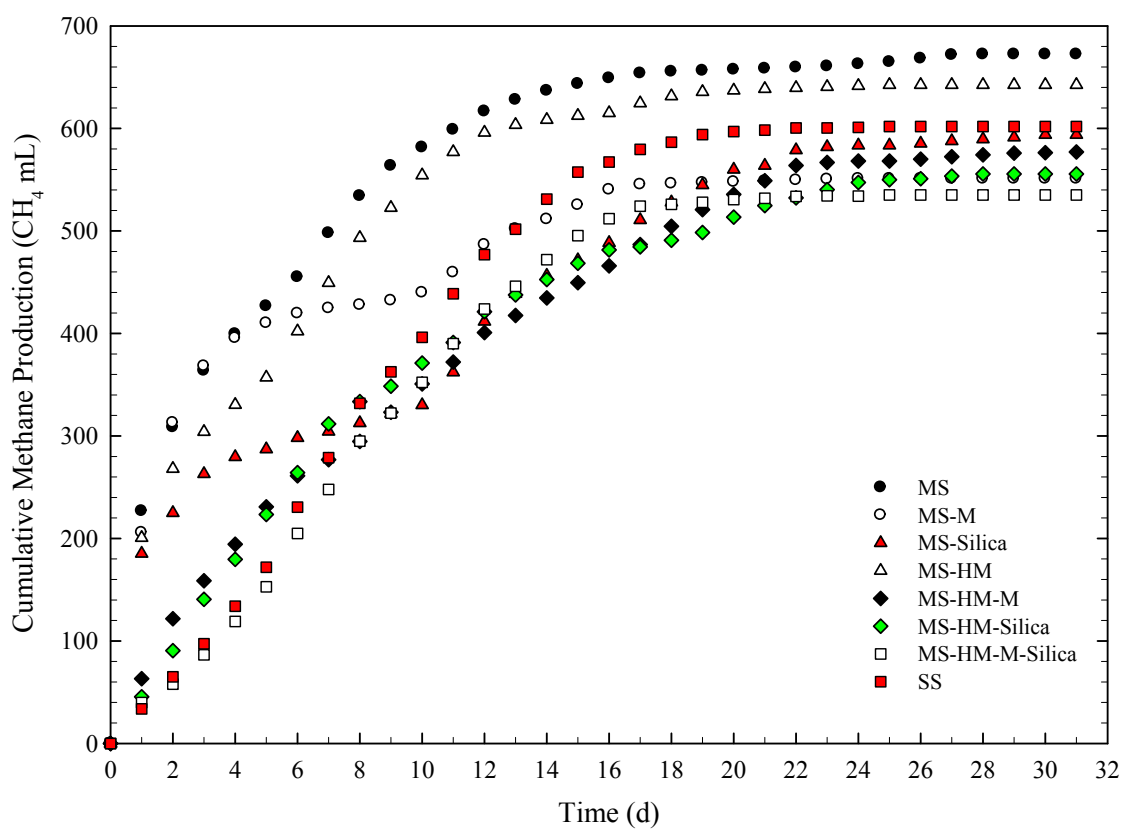

**Figure S1.** Cumulative methane production for different sludge samples (Methane production from only the inoculum was subtracted from total methane production)

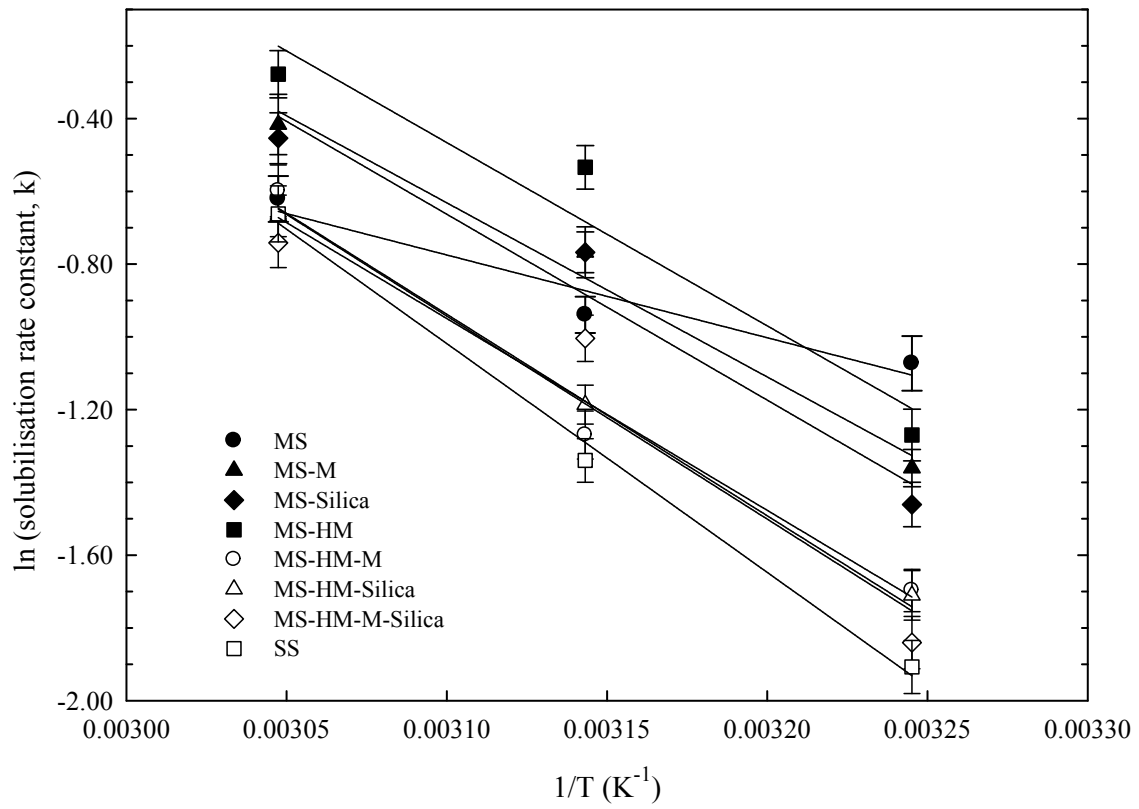

**Figure S2.** Arrhenius plots of different sludge samples
